# Supplementary material for: Do agricultural productive services alleviate farmland abandonment? Evidence from China rural household panel survey data
Source: Frontiers journal article supplement (doi:10.3389/fenvs.2023.1072005), 2023-03-20
Supplement: Data_Sheet_1.docx [file Data_Sheet_1.docx]

***Supplementary Material***

**Supplementary Tables**

TABLE 1 Definition and statistical results.

| Variables | Definition | Mean | S.D. |
| --- | --- | --- | --- |
| Land Abandonment Incidence | Yes=1；No=0 | 0.1063 | 0.3083 |
| Land Abandonment Area | The proportion of land abandonment area in the total land area | 0.0495 | 0.2412 |
| Agricultural Productive Services(APS) | Total expenditure of households on purchasing agricultural productive services（CNY/hm2） | 1009.1105. | 1306.7150 |
| Mechanism Variables |  |  |  |
| Proportion of Agricultural Labor | Proportion of agricultural labor in total household labor | 0.7485 | 0.3167 |
| Application of Agricultural Technology | Whether to apply organic fertilizer technology in agricultural production（Yes=1；No=0） | 0.1864 | 0.3895 |
| Land Transfer | Whether land transfer occurs （Yes=1；No=0） | 0.4379 | 0.3591 |
| Control Variables |  |  |  |
| Head Age | Household head’s age (year) | 56.3263 | 11.2124 |
| Head Gender | The gender of household head (0 = female; 1 = male) | 0.9160 | 0.2774 |
| Head Education | No school = 1; Primary school = 2; Junior high school = 3; High school = 4; Technical secondary school = 5; Junior college = 6; Bachelor degree or above = 7 | 2.5070 | 0.9044 |
| Head Marriage | Married =1；Unmarried =0（Yes=1；No=0） | 0.5747 | 0.0295 |
| Head Health | Health status of the head (very bad = 1; bad = 2; general = 3; good = 4; very good = 5) | 2.8738 | 1.0535 |
| Migrant Work Experience | Whether farmers have migrant work experiences（Yes=1; No=0） | 0.1624 | 0.3689 |
| Proportion of Non-farm Income | The proportion of off-farm income in total income | 0.6972 | 0.2615 |
| Agricultural Subsidies | The agricultural subsidies received by households in 2016(CNY) | 626.5661 | 2781.5880 |
| Farm Asset | Value of own machinery (CNY) | 3481.6350 | 40686.6800 |
| Land scale | Total farmland area in a household (hm2) | 0.5777 | 2.1748 |
| Number of plot | The number of farmland plots | 5.4802 | 6.1123 |
| Rent Out | The land rented out (hm2) | 0.0516 | 0.3243 |
| Distance to Township Government | Distance between village committee and township government (km) | 6.9027 | 5.9890 |
| Traffic Conditions | Number of roads from the village to the county Center | 2.6549 | 0.7661 |

TABLE 2 Estimated results of APS on land abandonment.

| variables | Logit Models for Land Abandonment Incidence | | | | | Tobit Models for Land Abandonment Area | | | IV Tobit Model for Land Abandonment Area | |
| --- | --- | --- | --- | --- | --- | --- | --- | --- | --- | --- |
| Model 1 | Model 2 | Model 3 | Model 4 | Model 5 | | Model 6 | Model 7 | | Model 8 |
| APS | -0.1055***  （0.0191） | -0.1094***  （0.0198） | -0.0094***  （0.0017） | -0.0901***  （0.0109） | -0.0946***  （0.0114） | | -0.0151***  （0.0018） | — | | -0.1020***  （0.0195） |
| Rural APS | — | — | — | — | — | | — | 0.6170***  （0.0255） | | — |
| Head Age | — | 0.4302  （0.3350） | 0.0370  （0.0287） | — | 0.1694  （0.1554） | | 0.0271  （0.0248） | 0.4185*  （0.2440） | | 0.2185*  （0.1240） |
| Head Gender | — | 0.2385  （0.1992） | 0.0205  （0.0171） | — | 0.0342  （0.1104） | | 0.0054  （0.0176） | 0.2440  （0.1828） | | 0.0500  （0.8720） |
| Head Education | — | 0.0301  （0.0709） | 0.0025  （0.0061） | — | 0.0047  （0.0358） | | 0.0007  （0.0057） | 0.2054***  （0.0558） | | 0.0192***  （0.0285） |
| Head Marriage | — | 0.0234  （0.0552） | 0.0020  （0.0047） | — | 0.0078  （0.0302） | | 0.0013  （0.0048） | -0.0205  （0.0488） | | -0.0012  （0.0243） |
| Head Health | — | 0.0570  （0.0575） | 0.0049  （0.0050） | — | 0.0207  （0.0305） | | 0.0033  （0.0048） | -0.0676  （0.0462） | | 0.0198  （0.0242） |
| Migrant Work Experience | — | 0.2265  （0.1677） | 0.0195  （0.0144） | — | 0.0938  （0.0855） | | 0.0150  （0.0136） | -0.2265*  （0.1283） | | 0.0560  （0.0679） |
| Proportion of Non-farm Income | — | 0.1979  （0.2339） | 0.0170  （0.0201） | — | 0.1510  （0.1232） | | 0.0241  （0.0197） | -0.3534*  （0.1905） | | 0.1186  （0.0982） |
| Agricultural Subsidies | — | -0.0509**  （0.0203） | -0.0043**  （0.0017） | — | -0.2229***  （0.0908） | | -0.2019***  （-0.0717） | 0.1003***  （0.0170） | | -0.0072  （0.0090） |
| Farm Asset | — | -0.0819***  （0.0177） | -0.0071***  （0.0015） | — | -0.0304***  （0.0090） | | -0.0048***  （0.0014） | -0.1033***  （0.0131） | | -0.0382***  （0.0076） |
| Land Area | — | -0.2822***  （0.0995） | -0.0243***  （0.0085） | — | -0.1502***  （0.0527） | | -0.0240**  （0.0084） | -0.4776***  （0.0810） | | -0.2338***  （0.0453） |
| Number of plot | — | 0.0244***  （0.0086） | 0.0021***  （0.0007） | — | 0.0099**  （0.0044） | | 0.0015**  （0.0007） | 0.0162**  （0.0082） | | 0.0093***  （0.0034） |
| Rent Out | — | 0.0716  （0.0638） | 0.0061  （0.0051） | — | 0.0273  （0.0241） | | 0.0043  （0.0032） | -0.0260*  （0.0147） | | 0.0275  （0.0212） |
| Distance to Township Government | — | -0.0070  （0.0097） | -0.0006  （0.0008） | — | 0.0014  （0.0051） | | -0.0002  （0.0008） | -0.0209**  （0.0083） | | -0.0043  （0.0042） |
| Traffic Conditions | — | 0.1041  （0.0788） | 0.0090  （0.0068） | — | 0.0910**  （0.0405） | | 0.0145**  （0.0064） | 0.1011***  （0.0633） | | 0.0676**  （0.0329） |
| Province | Yes | Yes | Yes | Yes | Yes | | Yes | Yes | | Yes |
| Constant | -3.3365***  (1.2318) | -4.2066***  （1.4378） | — | -0.6671***  （0.0845） | -2.1525***  （0.7019） | | — | 0.0940  （1.0947） | | -1.5776***  （0.5617） |
| Wald Chi Square Test | 212.99*** | 276.63*** | — | — | — | | — | — | | — |
| LR Chi Square Test | — | — | — | 295.99*** | 336.81*** | | — | — | | — |
| Pseudo R2/ Wald Exogenous Test | 0.1077 | 0.1355 | — | 0.1092 | 0.1245 | | — | — | | 5.54**  （0.0186） |
| F Value/Endogenous Wald | — | — | — | — | — | | — | 42.29*** | | 12.42*** |
| Observations | 3631 | 3631 | 3631 | 3631 | 3631 | | 3631 | 3631 | | 3631 |

Note: Robust standard errors in parentheses: * p < 0.10, ** p < 0.05, *** p < 0.01.

TABLE 3 Robustness test results.

| Variables | Robustness Check Models for Replacing Dependent Variable | | | Robustness Check Models for Replacing Core Independent Variable | | | Robustness Check Models for Replacing Sample Data | |
| --- | --- | --- | --- | --- | --- | --- | --- | --- |
|  | Model 9 | Model 10 | Model 11 | | Model 12 | Model 13(act) | | Model 14(area) |
| APS | -0.0333**  （0.0132） | -0.0351**  （0.0156） | — | | — | -0.1146*  （0.0602） | | -0.0472***  （0.0176） |
| Adoption Behavior of APS | — | — | -0.5291***  （0.0691） | | -0.5459***  （0.0718） | — | | — |
| Control Variables | No | Yes | No | | Yes | Yes | | Yes |
| Constant | 0.4149***  （0.0522） | -2.0352**  （0.8367） | -0.6669***  （0.0851） | | -2.1366***  （0.7009） | -3.9732***  （1.0671） | | -1.0567***  （0.2903） |
| F Value | 7.39*** | 3.18*** | — | | — | — | | — |
| Pseudo R2 | 0.0229 | 0.0555 | 0.1045 | | 0.1191 | — | | 0.1547 |
| LR Chi Square Test | — | — | 283.26*** | | 322.15*** | — | | 218.2*** |
| Wald Chi Square Test | — | — | — | | — | 189.35*** | | — |
| Province | Yes | Yes | Yes | | Yes | Yes | | Yes |
| Observations | 3631 | 3631 | 3631 | | 3631 | 8937 | | 8937 |

Note: Robust standard errors in parentheses: * p < 0.10, ** p < 0.05, *** p < 0.01.

TABLE 4 Estimated results of the impact mechanism of APS on land abandonment.

| Variables | Model 15 | Model 16 | Model 17 | Model 18 | Model 19 | Model 20 | Model 21 | Model 22 |
| --- | --- | --- | --- | --- | --- | --- | --- | --- |
| APS | -0.0946***  （0.0114） | -0.0128***  （0.0017） | 0.0245*  （0.0133） | 0.0194***  （0.0042） | -0.0912***  （0.0115） | -0.0891***  （0.0110） | -0.0859***  （0.0111） | -0.0872***  （0.0016） |
| ALS | — | — | — | — | 0.2390**  （0.1043） | — | — | 0.2542**  （0.1047） |
| TAE | — | — | — | — | — | -0.0331**  （0.0148） | — | -0.0423**  （0.0150） |
| LTE | — | — | — | — | — | — | -0.2773***  （0.0800） | -0.2545***  （0.0794） |
| Control Variables | Yes | Yes | Yes | Yes | Yes | Yes | Yes | Yes |
| Province | Yes | Yes | Yes | Yes | Yes | Yes | Yes | Yes |
| Constant | -2.1525***  （0.7019） | 0.6963***  （0.1229） | -4.8343**  （2.2652） | 0.3496  （1.0246） | -2.3164  （0.7085） | 1.5435  （1.6470） | 1.9590  （1.6824） | -2.1237**  （0.7071） |
| Adjusted R2 | — | 0.0714 | 0.0664 | 0.1437 | — | — | — | — |
| F Value | — | — | 5.33*** | 7.31*** | — | — | — | — |
| LR Chi Square Test | 336.81*** | — | — | — | 342.22*** | 336.65*** | 346.49*** | 363.17*** |
| Pseudo R2 | 0.1245 | — | — | — | 0.1265 | 0.1241 | 0.1278 | 0.1342 |
| Observations | 3631 | 3 631 | 3631 | 3 631 | 3 631 | 3631 | 3 631 | 3631 |

Note: Robust standard errors in parentheses: * p < 0.10, ** p < 0.05, *** p < 0.01.

TABLE 5 Estimated results of individual heterogeneity.

| Variables | Elderly Group  Model 23 | Non Elderly Group  Model 24 | Large Scale Group  Model 25 | Small Scale Group  Model 26 |
| --- | --- | --- | --- | --- |
| APS | -0.1300***  (0.0218) | -0.0885***  (0.0165) | -0.0470***  (0.0133) | -0.0969***  (0.0140) |
| Control Variables | Yes | Yes | Yes | Yes |
| Province | Yes | Yes | Yes | Yes |
| Constant | -1.1831***  （0.4366） | -1.7166  （0.6055） | 1.6142  （3.9889） | 1.4675  （1.8208） |
| LR Chi Square Test | 213.4*** | 164.11*** | 114.53*** | 252.38*** |
| Pseudo R2 | 0.1343 | 0.1287 | 0.2275 | 0.1160 |
| Observations | 1 783 | 1 848 | 927 | 2 704 |

Note: Robust standard errors in parentheses: * p < 0.10, ** p < 0.05, *** p < 0.01.

TABLE 6 Estimated results of regional heterogeneity.

| Variables | Major grain producing areas  Model 27 | Main grain sales area  Model 28 | Production and marketing balance area  Model 29 | Eastern  Model 30 | Central  Model 31 | Western  Model 32 | Karst area  Model 33 | Non karst area  Model 34 |
| --- | --- | --- | --- | --- | --- | --- | --- | --- |
| APS | -0.1268***  （0.0216） | -0.0836***  （0.0230） | -0.0510***  （0.0130） | -0.0643***  （0.0173） | -0.1976***  （0.0325） | -0.0313  （0.0418） | -0.0112  （0.0152） | -0.1256***  （0.0150） |
| Control Variables | Yes | Yes | Yes | Yes | Yes | Yes | Yes | Yes |
| Province | Yes | Yes | Yes | Yes | Yes | Yes | Yes | Yes |
| Constant | 3.6495  （4.3407） | -4.6897  （5.9874） | 7.6778  （2.6418） | -5.6417  (5.2534) | 0.9089  （8.4468） | 5.5906  （1.9270） | -1.7541**  （0.8719） | -2.9372***  （0.9886） |
| LR Chi Square Test | 185.65*** | 53.55*** | 107.57*** | 151.87*** | 127.51*** | 100.18*** | 54.71*** | 298.25*** |
| Pseudo R2 | 0.1535 | 0.1090 | 0.1161 | 0.1914 | 0.1531 | 0.0994 | 0.0851 | 0.1484 |
| Observations | 1 975 | 567 | 1 089 | 1 302 | 1 126 | 1 203 | 704 | 2927 |

Note: Robust standard errors in parentheses: ** p < 0.05, *** p < 0.01.
